# Supplementary material for: Diabetes Mellitus and Increased Tuberculosis Susceptibility: The Role of Short-Chain Fatty Acids
Source: Hindawi journal article supplement (doi:10.1155/2016/6014631), 2015-12-29

# Supplementary Figure 1

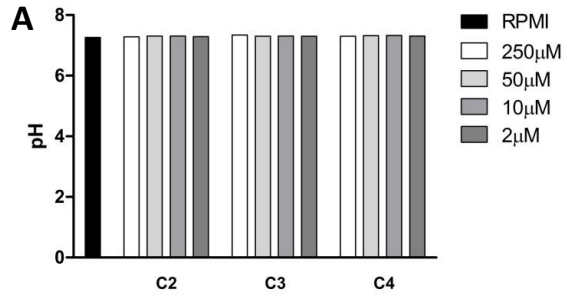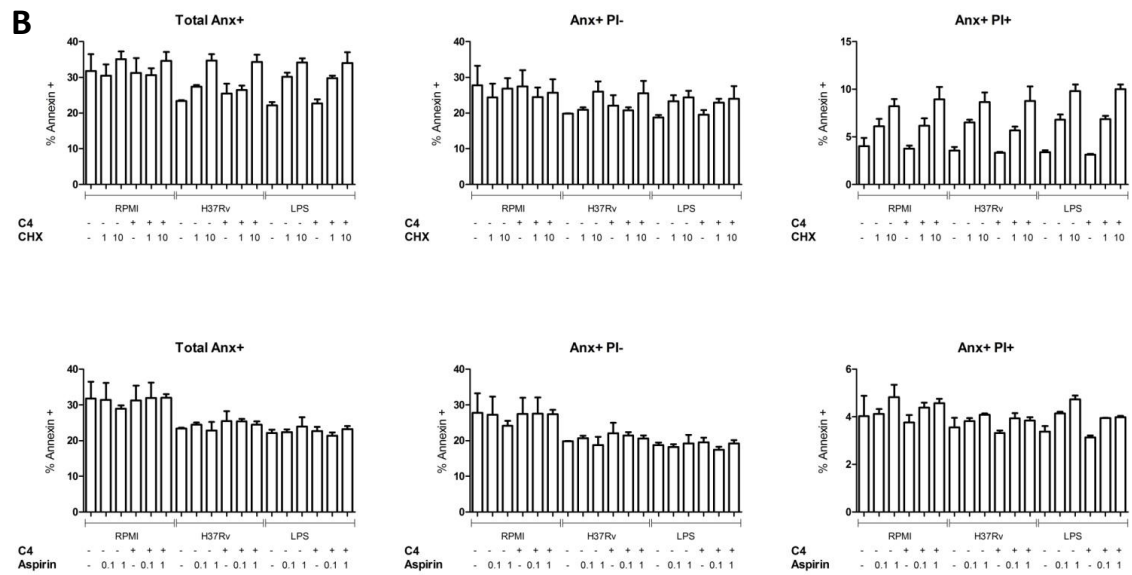

Supplementary Figure 2

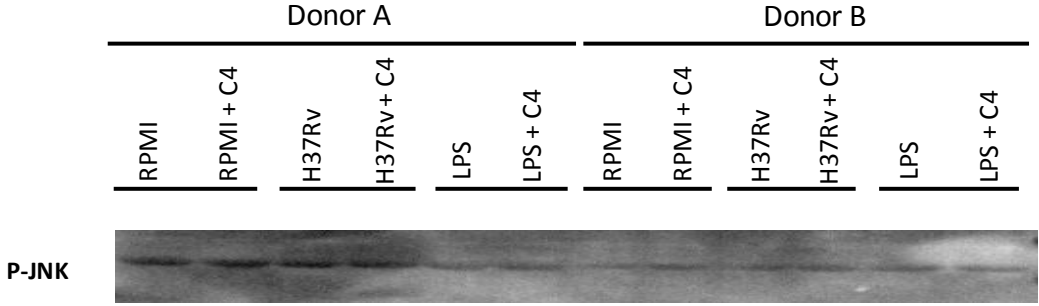

### Supplementary Figure 3

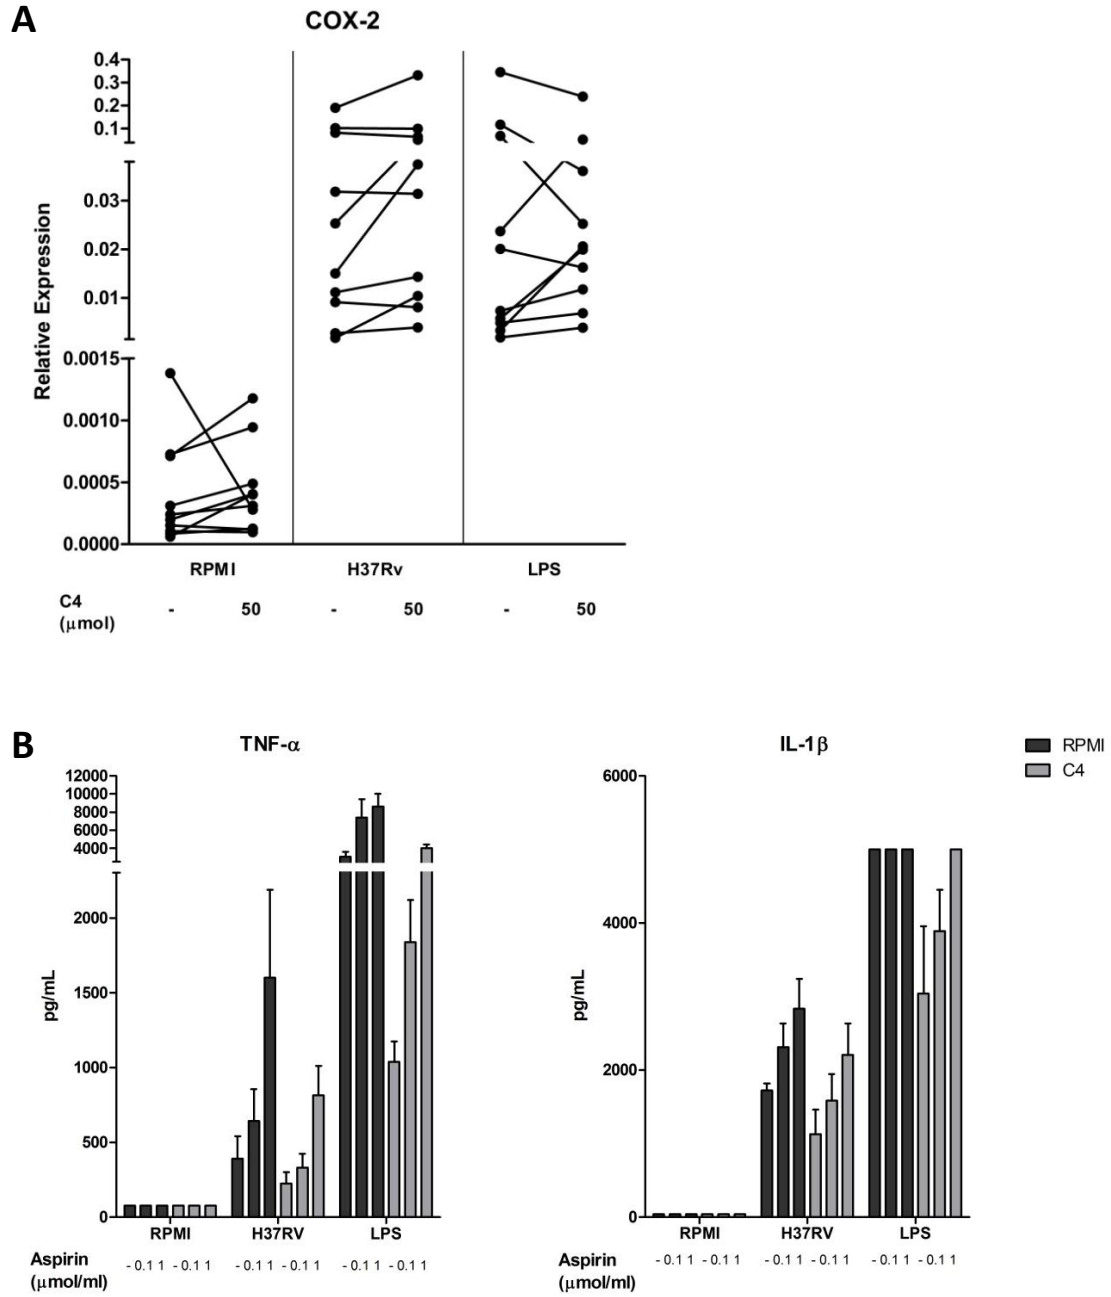

## Supplementary Figure 4

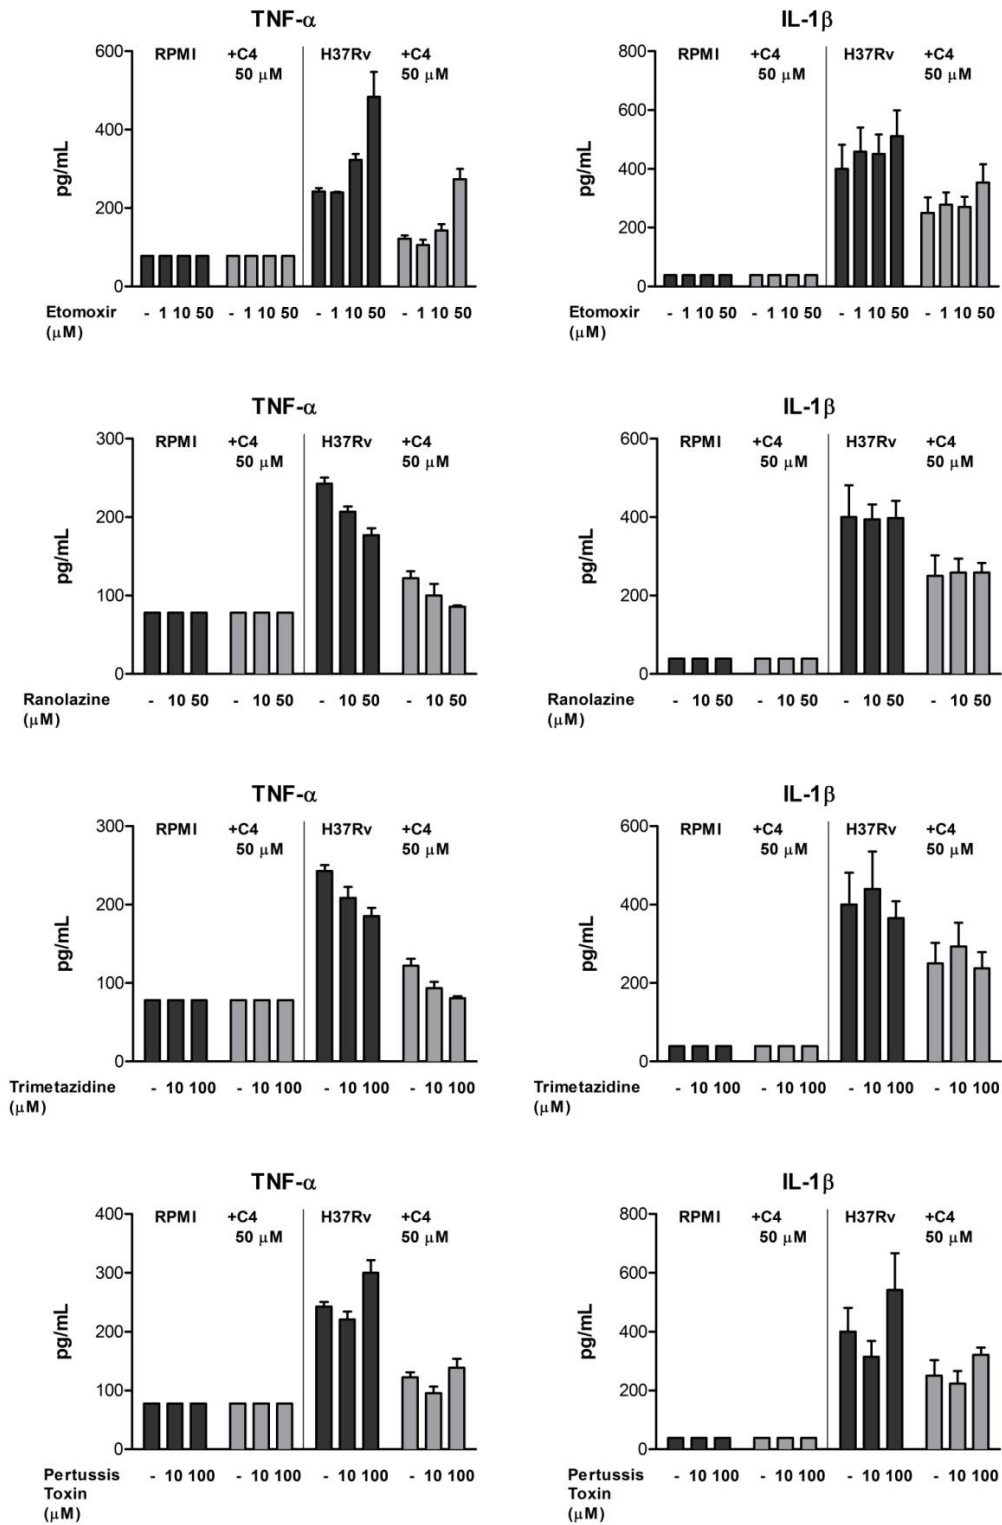

Supplementary Figure 5

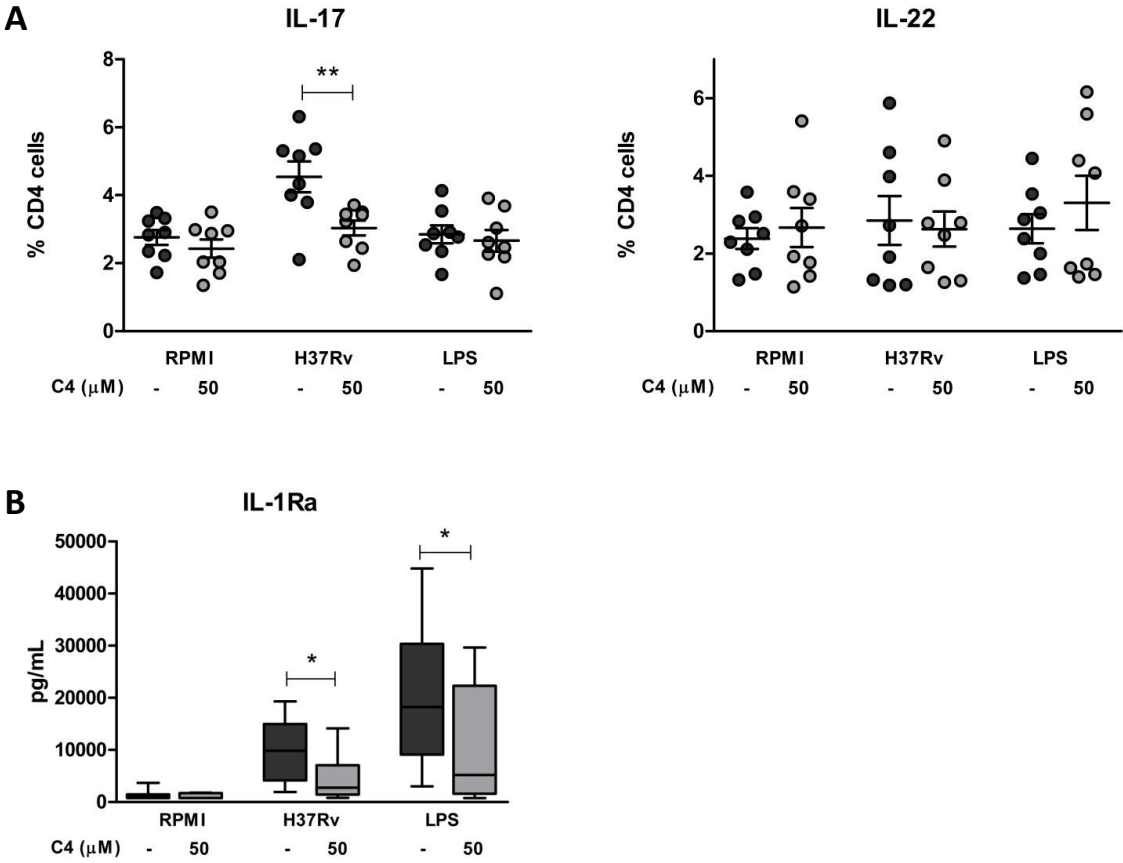

Supplement: f1 [file 6014631.f1.pdf]
